# Supplementary material for: Upregulation of Intestinal NLRP6 Inflammasomes After Roux-en-Y Gastric Bypass Promotes Gut Immune Homeostasis
Source: Springer Nature journal article supplement (doi:10.1007/s11695-019-04152-4), 2019-10-10
Supplement: MOESM2 [file 17259916]

| **NLRP6** | Forward 5’- TCCACTACCTGGTCATTGTGC-3’ |
| --- | --- |
| Reverse 5’- GCCAAAGCACCTTCTCCCAC -3’ |
| **IL-18** | Forward 5’- GACCGAACAGCCAACGAATC -3’ |
| Reverse 5’-TAGGGTCACAGCCAGTCCTC-3’ |
| **GAPDH** | Forward 5’-TCAAGAAGGTGGTGAAGCAG-3’ |
| Reverse 5’-AGGTGGAAGAATGGGAGTTG-3’ |

**Supplementary table 1:** The primer sequences of the target
